# Supplementary material for: Longitudinal Analysis Reveals Distinct Antibody and Memory B Cell Responses in SARS-CoV2 Naïve and Recovered Individuals Following mRNA Vaccination
Source: PubMed Central journal article supplement — medRxiv. 2021 Mar 6:2021.03.03.21252872. Preprint. [Version 1] doi: 10.1101/2021.03.03.21252872 (PMC7941668; doi:10.1101/2021.03.03.21252872), 2021-03-06

Figure S1

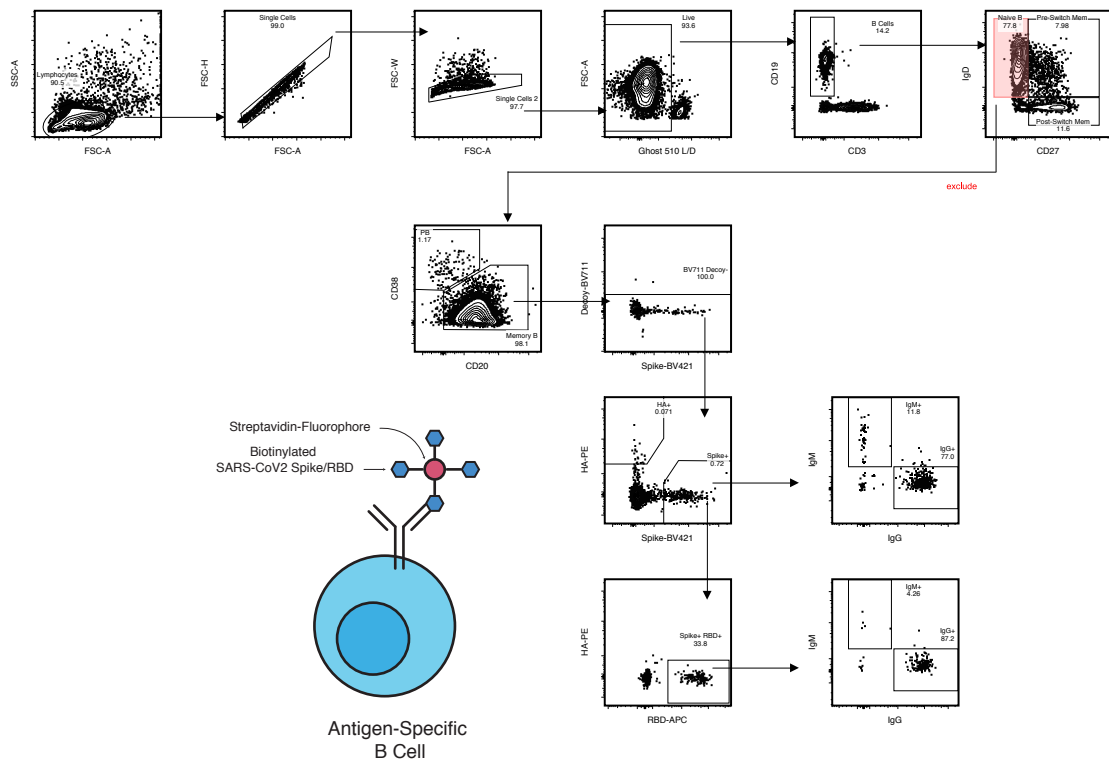

Figure S2

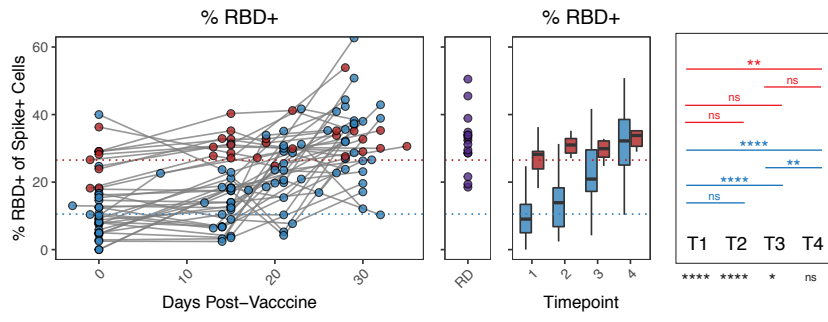

**Figure S3**

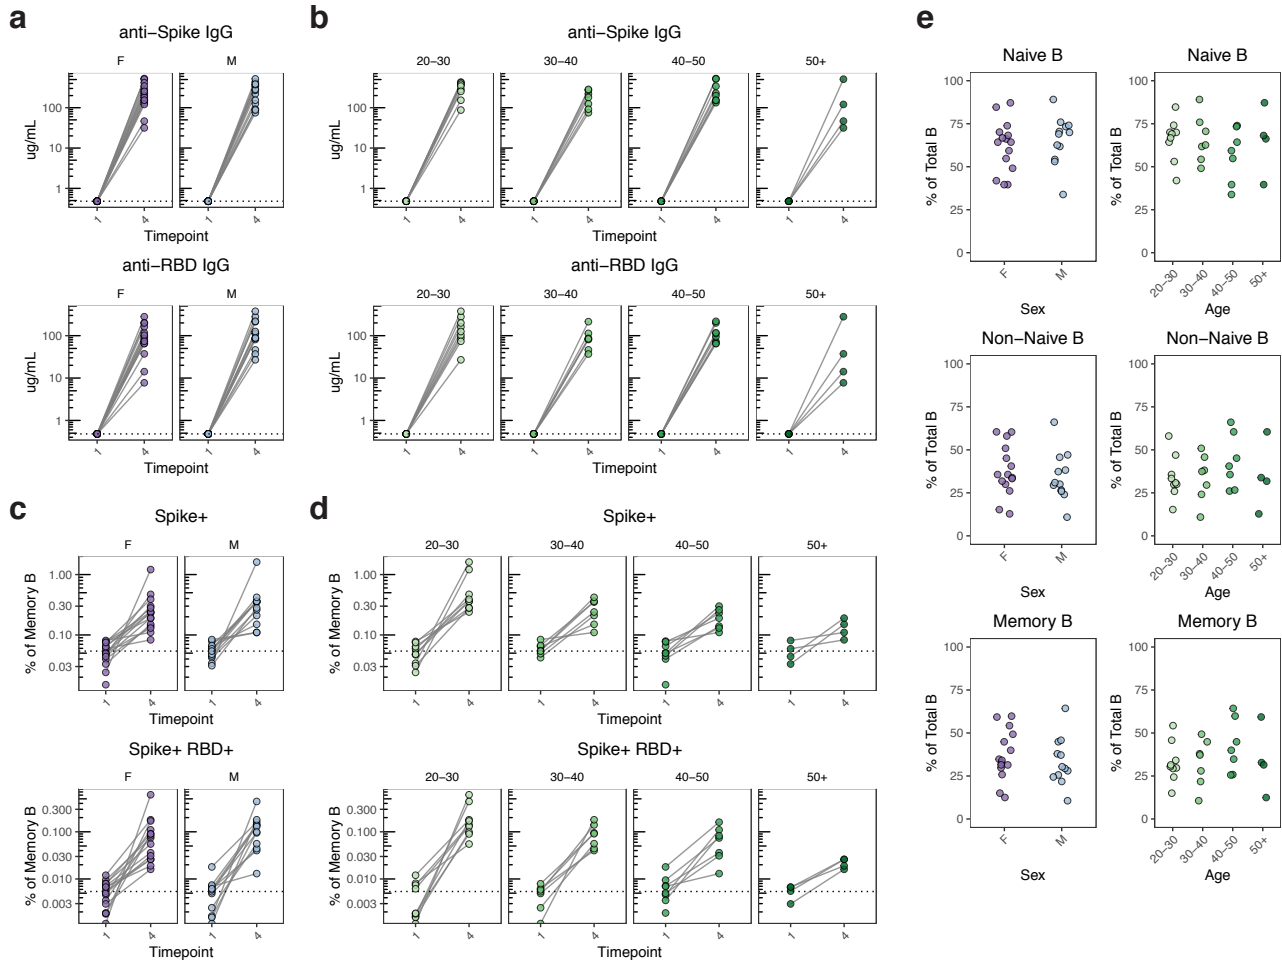

**Figure S4**

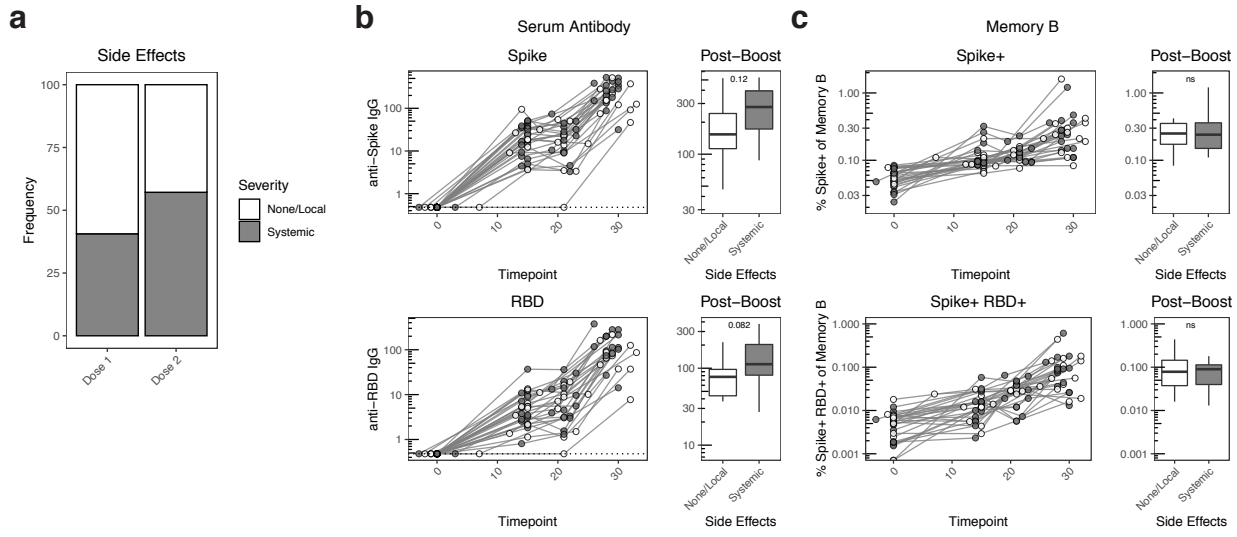

Supplement: media-1.pdf [file media-1.pdf]
